# Supplementary material
Source: publisher figshare collection journal article supplement (https://geolsoc.figshare.com/ndownloader/files/34318099)
Supplement: Supplementary file 1 [file 34318099]

## Sheet: Foglio1
	Table S7
	Sample	Type	Structural set	Structural domain	Calcite generation in vein	Ca (ppm)	Mg (ppm)	Sr (ppm)	Fe (ppm)	Mn (ppm)	Mg/Ca (mol/mol)	Sr/Ca (mol/mol)	Fe/Ca (mol/mol)	Mn/Ca (mol/mol)	T (°C)	T(K)	Kd Mg	Kd Sr	Kd Fe	Kd Mn	Mg/Ca (mol/mol) fluid	Sr/Ca (mol/mol) fluid	Fe/Ca (mol/mol) fluid	Ca/Fe (mol/mol) fluid	Mn/Ca (mol/mol) fluid
	pa5-19_41	Vein	V1	Crest	Cal-1a	399832	2436	491.8	1037	34.53	0.0100464	0.00088274	0.00189206	3.95022e-05	111	384.15	0.0751583	0.0679988	22.2844	9.3569	0.13367	0.0129817	8.4905e-05	11777.9	4.22172e-06
	pa5-19_42	Vein	V1	Crest	Cal-1a		2925	443.1	1095	39.26	0.0120631	0.000795327	0.00199788	4.49134e-05							0.160502	0.0116962	8.96538e-05	11154	4.80002e-06
	pa5-19_43	Vein	V1	Crest	Cal-1a		2587	442.9	1200	36.4	0.0106691	0.000794968	0.00218946	4.16415e-05							0.141955	0.0116909	9.82507e-05	10178	4.45035e-06
	pa5-19_47	Vein	V1	Crest	Cal-1a		3040	289.3	1333	37.14	0.0125374	0.000519269	0.00243212	4.24881e-05							0.166813	0.00763645	0.00010914	9162.53	4.54083e-06
	pa5-19_48	Vein	V1	Crest	Cal-1a		2502	461.1	1104	35.65	0.0103186	0.000827636	0.0020143	4.07835e-05							0.137291	0.0121713	9.03907e-05	11063.1	4.35866e-06
	pa5-19_49	Vein	V1	Crest	Cal-1a		3056	354.6	1282	38.57	0.0126034	0.000636477	0.00233907	4.4124e-05							0.167691	0.00936012	0.000104965	9527.03	4.71566e-06
	pa5-19_50	Vein	V1	Crest	Cal-1a		3779	295.8	1589	45.62	0.0155851	0.000530936	0.00289921	5.21892e-05							0.207364	0.00780802	0.0001301	7686.38	5.57761e-06
	pa7-30b_1	Vein	V4	Forelimb	Cal-1b	419485	1827	198.1	443.5	8.125	0.00718179	0.000338914	0.000771277	8.85951e-06	68	341.15	0.0460531	0.0731868	25.1739	13.6017	0.155946	0.00463081	3.0638e-05	32639.2	6.51355e-07
	pa7-30b_2	Vein	V4	Forelimb	Cal-1b		2066	171.1	296.8	8.574	0.00812128	0.000292722	0.000516156	9.3491e-06							0.176346	0.00399966	2.05036e-05	48771.8	6.8735e-07
	pa7-30b_3	Vein	V4	Forelimb	Cal-1b		1967	143.2	305.4	8.488	0.00773212	0.00024499	0.000531112	9.25533e-06							0.167896	0.00334746	2.10977e-05	47398.4	6.80456e-07
	pa7-30b_4	Vein	V4	Forelimb	Cal-1b		1743	233.2	600.2	8.061	0.00685159	0.000398964	0.00104379	8.78972e-06							0.148776	0.00545131	4.14632e-05	24117.8	6.46225e-07
	pa7-30b_5	Vein	V4	Forelimb	Cal-1b		2020	153.6	252.1	8.726	0.00794045	0.000262783	0.000438419	9.51484e-06							0.172419	0.00359057	1.74157e-05	57419.6	6.99535e-07
	pa7-30b_6	Vein	V4	Forelimb	Cal-1b		1570	208.9	2061	26.4	0.00617154	0.000357391	0.00358422	2.87866e-05							0.134009	0.00488327	0.000142379	7023.52	2.1164e-06
	pa7-27a_16	Vein	V1	Forelimb	Cal-1b	403390	1449	257.8	486.1	10.19	0.00592316	0.000458648	0.000879091	1.15545e-05							0.128616	0.00626682	3.49208e-05	28636.2	8.49493e-07
	pa7-27a_17	Vein	V1	Forelimb	Cal-1b		1476	470.3	473.2	13.82	0.00603353	0.000836704	0.000855762	1.56706e-05							0.131012	0.0114324	3.39941e-05	29416.9	1.15211e-06
	pa7-27a_18	Vein	V1	Forelimb	Cal-1b		1719	130.5	1920	33.21	0.00702686	0.000232171	0.00347224	3.76571e-05							0.152582	0.0031723	0.00013793	7250.04	2.76857e-06
	pa7-27a_19	Vein	V1	Forelimb	Cal-1b		2051	152.1	1118	15.24	0.00838399	0.000270599	0.00202185	1.72808e-05							0.18205	0.00369737	8.03156e-05	12450.9	1.27049e-06
	pa7-27a_20	Vein	V1	Forelimb	Cal-1b		1618	351	465.5	14.19	0.00661399	0.000624459	0.000841837	1.60901e-05							0.143617	0.0085324	3.34409e-05	29903.5	1.18296e-06
	pa3-21_63	Slickenfibers	CT	Crest	Cal-1 "type"	421680	2731	486.1	1482	94.62	0.0106795	0.000827303	0.00256388	0.000102637	84	357.15	0.0568659	0.070941	24.2726	11.8502	0.187801	0.0116618	0.000105629	9467.14	8.6612e-06
	pa3-21_64	Slickenfibers	CT	Crest	Cal-1 "type"		3327	437.9	1659	102.5	0.0130101	0.00074527	0.0028701	0.000111184							0.228786	0.0105055	0.000118244	8457.08	9.38251e-06
	pa3-21_66	Slickenfibers	CT	Crest	Cal-1 "type"		2113	474.5	1223	78.3	0.00826279	0.00080756	0.00211581	8.4934e-05							0.145303	0.0113835	8.71685e-05	11472	7.16732e-06
	pa3-21_67	Slickenfibers	CT	Crest	Cal-1 "type"		2975	514.8	1554	98.43	0.0116336	0.000876148	0.00268845	0.00010677							0.20458	0.0123504	0.00011076	9028.5	9.00996e-06
	pa3-21_68	Slickenfibers	CT	Crest	Cal-1 "type"		3747	569.9	1800	101.9	0.0146525	0.000969923	0.00311403	0.000110534							0.257667	0.0136723	0.000128294	7794.61	9.32759e-06
	pa3-21_69	Slickenfibers	CT	Crest	Cal-1 "type"		3136	661	1570	90.87	0.0122632	0.00112497	0.00271613	9.8569e-05							0.215651	0.0158578	0.000111901	8936.49	8.31794e-06
	pa3-21_70	Slickenfibers	CT	Crest	Cal-1 "type"		4376	319.1	2130	125.3	0.0171122	0.000543082	0.00368493	0.000135916							0.300921	0.00765541	0.000151814	6586.99	1.14695e-05
	pa3-21_71	Slickenfibers	CT	Crest	Cal-1 "type"		4944	212	1936	127.9	0.0193333	0.000360807	0.00334931	0.000138736							0.339981	0.00508601	0.000137987	7247.05	1.17075e-05
	pa3-21_72	Slickenfibers	CT	Crest	Cal-1 "type"		2808	629	1700	92.82	0.0109806	0.00107051	0.00294103	0.000100684							0.193096	0.0150901	0.000121166	8253.11	8.49644e-06
	pa3-21_73	Slickenfibers	CT	Crest	Cal-1 "type"		3451	513	1689	104	0.013495	0.000873084	0.002922	0.000112811							0.237313	0.0123072	0.000120382	8306.86	9.51982e-06
	pa3-21_74	Slickenfibers	CT	Crest	Cal-1 "type"		3486	403.7	2645	108.7	0.0136318	0.000687064	0.00457589	0.00011791							0.239719	0.00968501	0.000188521	5304.46	9.95004e-06
	pa5-6_7	Fault rock	Transversal Fault TF2	Crest	Cal-2	401128	2186	475.4	78.1	71.05	0.00898623	0.000850546	0.000142037	8.10184e-05	59	332.15	0.0402016	0.0746522	25.5579	14.6864	0.223529	0.0113935	5.55746e-06	179938	5.51655e-06
	pa5-6_8	Fault rock	Transversal Fault TF2	Crest	Cal-2		2078	469.8	78.59	63.93	0.00854226	0.000840527	0.000142928	7.28995e-05							0.212485	0.0112592	5.59232e-06	178817	4.96373e-06
	pa5-6_9	Fault rock	Transversal Fault TF2	Crest	Cal-2		399.3	37.32	170.9	72.3	0.00164145	6.67699e-05	0.000310808	8.24438e-05							0.0408303	0.000894412	1.21609e-05	82230.5	5.61361e-06
	pa5-6_10	Fault rock	Transversal Fault TF2	Crest	Cal-2		1940	454.7	80.62	57.25	0.00797497	0.000813512	0.00014662	6.52823e-05							0.198374	0.0108974	5.73677e-06	174314	4.44508e-06
	pa5-6_11	Fault rock	Transversal Fault TF2	Crest	Cal-2		2111	500.3	74.46	62.15	0.00867792	0.000895095	0.000135417	7.08698e-05							0.21586	0.0119902	5.29844e-06	188735	4.82553e-06
	pa5-6_12	Fault rock	Transversal Fault TF2	Crest	Cal-2		1438	241	106.8	21.99	0.00591135	0.000431177	0.000194232	2.50752e-05							0.147042	0.00577581	7.5997e-06	131584	1.70738e-06
	pa5-6_13	Fault rock	Transversal Fault TF2	Crest	Cal-2		1969	431.8	79.34	44.68	0.00809419	0.000772541	0.000144292	5.09487e-05							0.20134	0.0103485	5.64569e-06	177126	3.4691e-06
	pa5-6_14	Fault rock	Transversal Fault TF2	Crest	Cal-2		1900	437.8	79.69	38.61	0.00781054	0.000783275	0.000144929	4.40271e-05							0.194284	0.0104923	5.6706e-06	176348	2.99781e-06
	pa5-6_15	Fault rock	Transversal Fault TF2	Crest	Cal-2		1936	442.7	79.67	59.85	0.00795853	0.000792042	0.000144892	6.82471e-05							0.197965	0.0106098	5.66917e-06	176393	4.64695e-06
	pa5-19_44	Vein	V5	Crest	Cal-2	413901	1745	540.3	63.5	43.54	0.006952	0.000936829	0.000111921	4.81166e-05							0.172928	0.0125493	4.37911e-06	228357	3.27626e-06
	pa5-19_45	Vein	V5	Crest	Cal-2		2052	509	64.2	56.31	0.00817507	0.000882558	0.000113155	6.22289e-05							0.203352	0.0118223	4.42738e-06	225867	4.23717e-06
	pa5-19_46	Vein	V5	Crest	Cal-2		1205	533.3	49.76	38.48	0.00480066	0.000924692	8.77036e-05	4.25247e-05							0.119415	0.0123867	3.43156e-06	291412	2.89551e-06
	pa5-19_51	Vein	V5	Crest	Cal-2		1831	489.5	59.58	48.34	0.00729462	0.000848747	0.000105012	5.34212e-05							0.181451	0.0113694	4.10877e-06	243382	3.63745e-06
	pa3-1_32	Vein	V5	Crest	Cal-3	406139	1751	61.1	69.38	57.81	0.00710922	0.000107966	0.000124621	6.51075e-05	52	325.15	0.0358299	0.0759074	25.7849	15.5827	0.198416	0.00142234	4.83312e-06	206906	4.17819e-06
	pa3-1_33	Vein	V5	Crest	Cal-3		688.6	54.58	113.6	30.63	0.00279578	9.64452e-05	0.00020405	3.44965e-05							0.0780293	0.00127056	7.91356e-06	126365	2.21377e-06
	pa3-1_34	Vein	V5	Crest	Cal-3		758.5	65.15	192.1	36.26	0.00307958	0.000115123	0.000345053	4.08372e-05							0.08595	0.00151662	1.3382e-05	74727.3	2.62067e-06
	pa3-1_35	Vein	V5	Crest	Cal-3		657.2	64.86	64.57	31.06	0.00266829	0.00011461	0.000115982	3.49808e-05							0.0744711	0.00150987	4.49805e-06	222319	2.24485e-06
	pa3-1_36	Vein	V5	Crest	Cal-3	400500	345.8	28.31	63.85	18.92	0.00142375	5.0025e-05	0.000116303	2.16083e-05							0.0397363	0.000659027	4.51052e-06	221704	1.38669e-06
	pa3-1_37	Vein	V5	Crest	Cal-3		432.6	38.62	141.1	23.94	0.00178113	6.9204e-05	0.000257015	2.73416e-05							0.0497106	0.000911691	9.96764e-06	100325	1.75461e-06
	pa3-1_38	Vein	V5	Crest	Cal-3		454.7	35.33	77.93	31.7	0.00187212	6.33086e-05	0.00014195	3.62042e-05							0.0522502	0.000834025	5.50516e-06	181648	2.32336e-06
	pa3-1_39	Vein	V5	Crest	Cal-3		639	49.16	138.1	31.88	0.00263093	8.80909e-05	0.00025155	3.64098e-05							0.0734283	0.00116051	9.75572e-06	102504	2.33655e-06
	pa3-1_40	Vein	V5	Crest	Cal-3		833.3	70.57	60.96	37.84	0.00343091	0.000126456	0.000111039	4.32167e-05							0.0957556	0.00166592	4.30636e-06	232215	2.77337e-06
